# Supplementary material for: Atogepant for the Prevention of Episodic Migraine in Adults: A Systematic Review and Meta-Analysis of Efficacy and Safety
Source: Springer Nature journal article supplement (doi:10.1007/s40120-022-00370-8), 2022-06-15
Supplement: MOESM1 [file 23165074]

## *Supplementary Material*

### **Atogepant for the Prevention of Episodic Migraine in Adults: A Systematic Review and Meta-Analysis of Efficacy and Safety**

Simona Lattanzi (MD, PhD)<sup>1</sup>, Eugen Trinka (MD, MSc, FRCP)<sup>2-4</sup>, Claudia Altamura (MD)<sup>5</sup>,

Cinzia Del Giovane (PhD)<sup>6</sup>, Mauro Silvestrini (MD)<sup>1</sup>, Francesco Brigo (MD)<sup>7</sup>,

Fabrizio Vernieri (MD)<sup>5</sup>

<sup>1</sup>Neurological Clinic, Department of Experimental and Clinical Medicine, Marche Polytechnic University, Ancona, Italy.

<sup>2</sup>Department of Neurology, Christian Doppler Klinik, Paracelsus Medical University, Salzburg, Austria.

<sup>3</sup>Center for Cognitive Neuroscience, Salzburg, Austria.

<sup>4</sup>Public Health, Health Services Research and HTA, University for Health Sciences, Medical Informatics and Technology, Hall in Tirol, Austria.

<sup>5</sup>Headache and Neurosonology Unit, Fondazione Policlinico Campus Bio-Medico of Rome, Rome, Italy.

<sup>6</sup>Institute of Primary Health Care (BIHAM), University of Bern, Bern, Switzerland.

<sup>7</sup>Division of Neurology, "Franz Tappeiner" Hospital, Merano (BZ), Italy.

Correspondence to: Simona Lattanzi, Neurological Clinic, Department of Experimental and Clinical Medicine, Marche Polytechnic University, Ancona, Italy; e-mail: [alfierelattanzisimona@gmail.com](mailto:alfierelattanzisimona@gmail.com)

**p3: Table e-1: Certainty of the evidence**

**p6: e-Appendix I. Search strategy**

**p7: e-Reference**

**Table e-1. Certainty of the evidence**

| Certainty assessment                                                                                       |              |               |              |             |                  |                               | Summary of findings   |                |                          |                              |                                                |
|------------------------------------------------------------------------------------------------------------|--------------|---------------|--------------|-------------|------------------|-------------------------------|-----------------------|----------------|--------------------------|------------------------------|------------------------------------------------|
| Participants (studies)                                                                                     | Risk of bias | Inconsistency | Indirectness | Imprecision | Publication bias | Overall certainty of evidence | Study event rates (%) |                | Relative effect (95% CI) | Anticipated absolute effects |                                                |
|                                                                                                            |              |               |              |             |                  |                               | With placebo          | With Atogepant |                          | Risk with placebo            | Risk difference with Atogepant                 |
| <b>Change in baseline monthly migraine days (atogepant 10 mg versus placebo)</b>                           |              |               |              |             |                  |                               |                       |                |                          |                              |                                                |
| 698 (2 RCTs)                                                                                               | not serious  | not serious   | not serious  | not serious | none             | ⊕⊕⊕⊕<br>High                  | 392                   | 306            | -                        | -                            | MD <b>-1.16</b><br>(1.6 lower to 0.73 lower)   |
| <b>Change in baseline monthly migraine days (atogepant 30 mg versus placebo)</b>                           |              |               |              |             |                  |                               |                       |                |                          |                              |                                                |
| 797 (2 RCTs)                                                                                               | not serious  | not serious   | not serious  | not serious | none             | ⊕⊕⊕⊕<br>High                  | 392                   | 405            | -                        | -                            | MD <b>-1.15</b><br>(1.54 lower to 0.76 lower)  |
| <b>Change in baseline monthly migraine days (atogepant 60 mg versus placebo)</b>                           |              |               |              |             |                  |                               |                       |                |                          |                              |                                                |
| 791 (2 RCTs)                                                                                               | not serious  | not serious   | not serious  | not serious | none             | ⊕⊕⊕⊕<br>High                  | 392                   | 399            | -                        | -                            | MD <b>-1.20</b><br>(2.18 lower to 0.22 lower)  |
| <b>Change in baseline monthly headache days (atogepant 10 mg versus placebo)</b>                           |              |               |              |             |                  |                               |                       |                |                          |                              |                                                |
| 698 (2 RCTs)                                                                                               | not serious  | not serious   | not serious  | not serious | none             | ⊕⊕⊕⊕<br>High                  | 392                   | 306            | -                        | -                            | MD <b>-1.40</b><br>(1.88 lower to 0.92 higher) |
| <b>Change in baseline monthly headache days (atogepant 30 mg versus placebo)</b>                           |              |               |              |             |                  |                               |                       |                |                          |                              |                                                |
| 797 (2 RCTs)                                                                                               | not serious  | not serious   | not serious  | not serious | none             | ⊕⊕⊕⊕<br>High                  | 392                   | 405            | -                        | -                            | MD <b>-1.44</b><br>(1.9 lower to 0.98 lower)   |
| <b>Change in baseline monthly headache days (atogepant 60 mg versus placebo)</b>                           |              |               |              |             |                  |                               |                       |                |                          |                              |                                                |
| 791 (2 RCTs)                                                                                               | not serious  | not serious   | not serious  | not serious | none             | ⊕⊕⊕⊕<br>High                  | 392                   | 399            | -                        | -                            | MD <b>-1.48</b><br>(1.95 lower to 1.02 lower)  |
| <b>Change in baseline monthly days of use of medications for migraine (atogepant 10 mg versus placebo)</b> |              |               |              |             |                  |                               |                       |                |                          |                              |                                                |
| 698 (2 RCTs)                                                                                               | not serious  | not serious   | not serious  | not serious | none             | ⊕⊕⊕⊕<br>High                  | 306                   | 392            | -                        | -                            | MD <b>-1.30</b><br>(1.74 lower to 0.86 lower)  |

| Certainty assessment |  |  |  |  |  |  | Summary of findings |  |  |  |  |
|----------------------|--|--|--|--|--|--|---------------------|--|--|--|--|
|----------------------|--|--|--|--|--|--|---------------------|--|--|--|--|

**Change in baseline monthly days of use of medications for migraine (atogepant 30 mg versus placebo)**

|                 |             |             |             |             |      |              |     |     |   |   |                                               |
|-----------------|-------------|-------------|-------------|-------------|------|--------------|-----|-----|---|---|-----------------------------------------------|
| 797<br>(2 RCTs) | not serious | not serious | not serious | not serious | none | ⊕⊕⊕⊕<br>High | 405 | 392 | - | - | MD <b>-1.40</b><br>(1.79 lower to 1.01 lower) |
|-----------------|-------------|-------------|-------------|-------------|------|--------------|-----|-----|---|---|-----------------------------------------------|

**Change in baseline monthly days of use of medications for migraine (atogepant 60 mg versus placebo)**

|                 |             |             |             |             |      |              |     |     |   |   |                                               |
|-----------------|-------------|-------------|-------------|-------------|------|--------------|-----|-----|---|---|-----------------------------------------------|
| 791<br>(2 RCTs) | not serious | not serious | not serious | not serious | none | ⊕⊕⊕⊕<br>High | 399 | 392 | - | - | MD <b>-1.30</b><br>(1.69 lower to 0.91 lower) |
|-----------------|-------------|-------------|-------------|-------------|------|--------------|-----|-----|---|---|-----------------------------------------------|

**Reduction of at least 50% in baseline monthly migraine days (atogepant 10 mg versus placebo)**

|                 |             |             |             |             |      |              |                    |                    |                                  |               |                                                          |
|-----------------|-------------|-------------|-------------|-------------|------|--------------|--------------------|--------------------|----------------------------------|---------------|----------------------------------------------------------|
| 698<br>(2 RCTs) | not serious | not serious | not serious | not serious | none | ⊕⊕⊕⊕<br>High | 134/392<br>(34.2%) | 172/306<br>(56.2%) | <b>RR 1.70</b><br>(1.43 to 2.03) | 342 per 1.000 | <b>239 more per 1.000</b><br>(from 147 more to 352 more) |
|-----------------|-------------|-------------|-------------|-------------|------|--------------|--------------------|--------------------|----------------------------------|---------------|----------------------------------------------------------|

**Reduction of at least 50% in baseline monthly migraine days (atogepant 30 mg versus placebo)**

|                 |             |             |             |             |      |              |                    |                    |                                  |               |                                                         |
|-----------------|-------------|-------------|-------------|-------------|------|--------------|--------------------|--------------------|----------------------------------|---------------|---------------------------------------------------------|
| 797<br>(2 RCTs) | not serious | not serious | not serious | not serious | none | ⊕⊕⊕⊕<br>High | 134/392<br>(34.2%) | 228/405<br>(56.3%) | <b>RR 1.63</b><br>(1.07 to 2.49) | 342 per 1.000 | <b>215 more per 1.000</b><br>(from 24 more to 509 more) |
|-----------------|-------------|-------------|-------------|-------------|------|--------------|--------------------|--------------------|----------------------------------|---------------|---------------------------------------------------------|

**Reduction of at least 50% in baseline monthly migraine days (atogepant 60 mg versus placebo)**

|                 |             |             |             |             |      |              |                    |                    |                                  |               |                                                        |
|-----------------|-------------|-------------|-------------|-------------|------|--------------|--------------------|--------------------|----------------------------------|---------------|--------------------------------------------------------|
| 791<br>(2 RCTs) | not serious | not serious | not serious | not serious | none | ⊕⊕⊕⊕<br>High | 134/392<br>(34.2%) | 227/399<br>(56.9%) | <b>RR 1.64</b><br>(1.02 to 2.66) | 342 per 1.000 | <b>219 more per 1.000</b><br>(from 7 more to 567 more) |
|-----------------|-------------|-------------|-------------|-------------|------|--------------|--------------------|--------------------|----------------------------------|---------------|--------------------------------------------------------|

**Any adverse event (atogepant 10 mg versus placebo)**

|                 |             |             |             |                      |      |                  |                    |                    |                                  |               |                                                          |
|-----------------|-------------|-------------|-------------|----------------------|------|------------------|--------------------|--------------------|----------------------------------|---------------|----------------------------------------------------------|
| 722<br>(2 RCTs) | not serious | not serious | not serious | serious <sup>a</sup> | none | ⊕⊕⊕○<br>Moderate | 218/408<br>(53.4%) | 178/314<br>(56.7%) | <b>RR 1.11</b><br>(0.78 to 1.56) | 534 per 1.000 | <b>59 more per 1.000</b><br>(from 118 fewer to 299 more) |
|-----------------|-------------|-------------|-------------|----------------------|------|------------------|--------------------|--------------------|----------------------------------|---------------|----------------------------------------------------------|

**Any adverse event (atogepant 30 mg versus placebo)**

|                 |             |             |             |                      |      |                  |                    |                    |                                  |               |                                                          |
|-----------------|-------------|-------------|-------------|----------------------|------|------------------|--------------------|--------------------|----------------------------------|---------------|----------------------------------------------------------|
| 819<br>(2 RCTs) | not serious | not serious | not serious | serious <sup>a</sup> | none | ⊕⊕⊕○<br>Moderate | 218/408<br>(53.4%) | 234/411<br>(56.9%) | <b>RR 1.08</b><br>(0.79 to 1.48) | 534 per 1.000 | <b>43 more per 1.000</b><br>(from 112 fewer to 256 more) |
|-----------------|-------------|-------------|-------------|----------------------|------|------------------|--------------------|--------------------|----------------------------------|---------------|----------------------------------------------------------|

**Any adverse event (atogepant 60 mg versus placebo)**

| Certainty assessment |             |             |             |                      |      |                  | Summary of findings |                    |                                  |               |                                                        |
|----------------------|-------------|-------------|-------------|----------------------|------|------------------|---------------------|--------------------|----------------------------------|---------------|--------------------------------------------------------|
| 825<br>(2 RCTs)      | not serious | not serious | not serious | serious <sup>a</sup> | none | ⊕⊕⊕○<br>Moderate | 218/408<br>(53.4%)  | 231/417<br>(55.4%) | <b>RR 1.04</b><br>(0.91 to 1.17) | 534 per 1.000 | <b>21 more per 1.000</b><br>(from 48 fewer to 91 more) |

### Any serious adverse event (atogepant 10 mg versus placebo)

|                 |             |             |             |                           |      |             |              |              |                                  |              |                                                       |
|-----------------|-------------|-------------|-------------|---------------------------|------|-------------|--------------|--------------|----------------------------------|--------------|-------------------------------------------------------|
| 722<br>(2 RCTs) | not serious | not serious | not serious | very serious <sup>b</sup> | none | ⊕⊕○○<br>Low | 4/408 (1.0%) | 3/314 (1.0%) | <b>RR 1.00</b><br>(0.22 to 4.54) | 10 per 1.000 | <b>0 fewer per 1.000</b><br>(from 8 fewer to 35 more) |
|-----------------|-------------|-------------|-------------|---------------------------|------|-------------|--------------|--------------|----------------------------------|--------------|-------------------------------------------------------|

### Any serious adverse event (atogepant 30 mg versus placebo)

|                 |             |             |             |                           |      |             |              |              |                                  |              |                                                       |
|-----------------|-------------|-------------|-------------|---------------------------|------|-------------|--------------|--------------|----------------------------------|--------------|-------------------------------------------------------|
| 819<br>(2 RCTs) | not serious | not serious | not serious | very serious <sup>b</sup> | none | ⊕⊕○○<br>Low | 4/408 (1.0%) | 2/411 (0.5%) | <b>RR 0.56</b><br>(0.12 to 2.58) | 10 per 1.000 | <b>4 fewer per 1.000</b><br>(from 9 fewer to 15 more) |
|-----------------|-------------|-------------|-------------|---------------------------|------|-------------|--------------|--------------|----------------------------------|--------------|-------------------------------------------------------|

### Any serious adverse event (atogepant 60 mg versus placebo)

|                 |             |             |             |                           |      |             |              |              |                                  |              |                                                       |
|-----------------|-------------|-------------|-------------|---------------------------|------|-------------|--------------|--------------|----------------------------------|--------------|-------------------------------------------------------|
| 825<br>(2 RCTs) | not serious | not serious | not serious | very serious <sup>b</sup> | none | ⊕⊕○○<br>Low | 4/408 (1.0%) | 2/417 (0.5%) | <b>RR 0.55</b><br>(0.12 to 2.54) | 10 per 1.000 | <b>4 fewer per 1.000</b><br>(from 9 fewer to 15 more) |
|-----------------|-------------|-------------|-------------|---------------------------|------|-------------|--------------|--------------|----------------------------------|--------------|-------------------------------------------------------|

### Discontinuation due to adverse events (atogepant 10 mg versus placebo)

|                 |             |             |             |                           |      |             |               |               |                                  |              |                                                       |
|-----------------|-------------|-------------|-------------|---------------------------|------|-------------|---------------|---------------|----------------------------------|--------------|-------------------------------------------------------|
| 722<br>(2 RCTs) | not serious | not serious | not serious | very serious <sup>b</sup> | none | ⊕⊕○○<br>Low | 11/408 (2.7%) | 13/314 (4.1%) | <b>RR 1.54</b><br>(0.69 to 3.42) | 27 per 1.000 | <b>15 more per 1.000</b><br>(from 8 fewer to 65 more) |
|-----------------|-------------|-------------|-------------|---------------------------|------|-------------|---------------|---------------|----------------------------------|--------------|-------------------------------------------------------|

### Discontinuation due to adverse events (atogepant 30 mg versus placebo)

|                 |             |             |             |                           |      |             |               |               |                                  |              |                                                        |
|-----------------|-------------|-------------|-------------|---------------------------|------|-------------|---------------|---------------|----------------------------------|--------------|--------------------------------------------------------|
| 819<br>(2 RCTs) | not serious | not serious | not serious | very serious <sup>b</sup> | none | ⊕⊕○○<br>Low | 11/408 (2.7%) | 15/411 (3.6%) | <b>RR 1.36</b><br>(0.63 to 2.92) | 27 per 1.000 | <b>10 more per 1.000</b><br>(from 10 fewer to 52 more) |
|-----------------|-------------|-------------|-------------|---------------------------|------|-------------|---------------|---------------|----------------------------------|--------------|--------------------------------------------------------|

### Discontinuation due to adverse events (atogepant 60 mg versus placebo)

|                 |             |             |             |                           |      |             |               |               |                                  |              |                                                       |
|-----------------|-------------|-------------|-------------|---------------------------|------|-------------|---------------|---------------|----------------------------------|--------------|-------------------------------------------------------|
| 825<br>(2 RCTs) | not serious | not serious | not serious | very serious <sup>b</sup> | none | ⊕⊕○○<br>Low | 11/408 (2.7%) | 12/417 (2.9%) | <b>RR 1.07</b><br>(0.48 to 2.39) | 27 per 1.000 | <b>2 more per 1.000</b><br>(from 14 fewer to 37 more) |
|-----------------|-------------|-------------|-------------|---------------------------|------|-------------|---------------|---------------|----------------------------------|--------------|-------------------------------------------------------|

CI: confidence interval; MD: mean difference; RR: risk ratio

<sup>a</sup>Downgraded once for imprecision: the CI fails to exclude important benefit or important harm

<sup>b</sup>Downgraded twice for imprecision: the CI fails to exclude important benefit or important harm; there are very few events.

## **e-Appendix I**

### **PubMed search strategy**

The strategy was based on the Cochrane Highly Sensitive Search Strategy for identifying randomized trials.<sup>e-1</sup>

- #1 random\* OR placebo OR trial\* OR group\* [Title/Abstract]
- #2 "Randomized Controlled Trial"[Publication Type]
- #3 "Controlled Clinical Trial"[Publication Type]
- #4 ((#1) OR #2) OR #3
- #5 "Animals"[Mesh] NOT "Humans"[Mesh]
- #6 #4 NOT #5
- #7 atogepant [Title/Abstract]
- #8 migraine [Title/Abstract]
- #9 #7 AND #8
- #10 #6 AND #9

### **CENTRAL search strategy**

(atogepant) AND (migraine) in Title, Abstract, Keywords in Trials'

### **ClinicalTrials.gov search strategy**

(atogepant) AND (migraine) | Interventional Studies

## **e-Reference**

e-1 Lefebvre C, Manheimer E, Glanville J. Chapter 6: Searching for studies. In: Higgins JPT, Green S (editors). *Cochrane Handbook for Systematic Reviews of Interventions Version 5.0.2* (updated September 2009). The Cochrane Collaboration, 2009. Available from [www.cochranehandbook.org](http://www.cochranehandbook.org).
